# Supplementary material for: Up-regulation of chemokine receptor CCR4 is associated with Human Hepatocellular Carcinoma malignant behavior
Source: PubMed Central journal article supplement (PMC5620046; doi:10.1038/s41598-017-10267-4), 2017-09-28
Supplement: 41598_2017_10267_MOESM1_ESM.pdf [file 41598_2017_10267_MOESM1_ESM.pdf]

**Up-regulation of chemokine receptor CCR4 is associated with Human  
Hepatocellular Carcinoma malignant behavior**

Xi Cheng<sup>1, 2\*</sup>, Huo Wu<sup>1, 3\*</sup>, Zhi-Jian Jin<sup>1, 2\*</sup>, Ding Ma<sup>1, 2,</sup>, Bai-Yong Shen<sup>1, 2,</sup>

Cheng-Hong Peng<sup>1, 2\*\*</sup>, Ren Zhao<sup>1, 2\*\*</sup> & Wei-Hua Qiu<sup>1, 2\*\*</sup>

**Supplementary Figure1. CCR4 expression doesn't affect the proliferation of  
HCC cells in vitro.**

**A&B.** Plant clone formation assay doesn't show significantly effect on HCC cell growth for CCR4 down-regulate group or CCR4 up-regulate group. **C&D.** Soft-agar clone formation doesn't show significantly effect on HCC cell growth for CCR4 down-regulate group or CCR4 up-regulate group

**Supplementary Data of Figure2A; 5A&D; 6A&B; 7A&C are replicates rather than the original photography of the blots in the main figures, All these blots come from replicate experiments!**

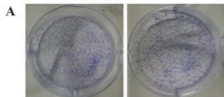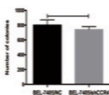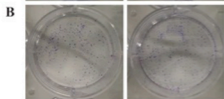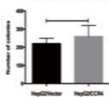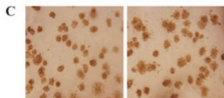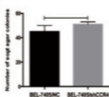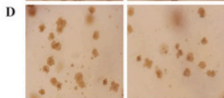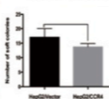

**Supplementary Figure1. CCR4 expression does not affect the proliferation of HCC cells *in vitro*.**

**A&B.** Plant clone formation assay doesn't show significantly effect on HCC cell growth for CCR4 down-regulate group or CCR4 up-regulate group.

**C&D.** Soft-agar clone formation doesn't show significantly effect on HCC cell growth for CCR4 down-regulate group or CCR4 up-regulate group.

# Supplementary supporting data for Figure 2A. 5 A,D and 6 A,B

BEL-7405NC BEL-7405/shCCR4 HepG2/vector HepG2/CCR4

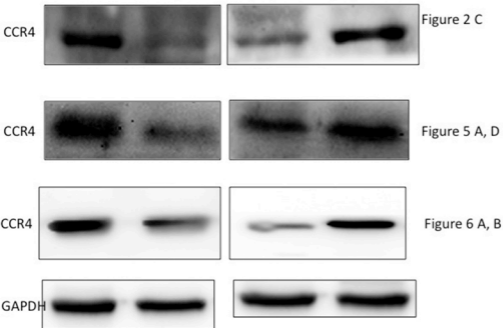

# Supplementary supporting data for Figure 3A

BEL-7405/shNC

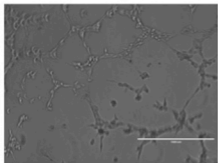

BEL-7405/shCCR4

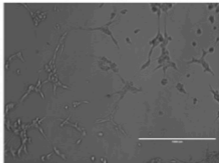

HepG2/vector

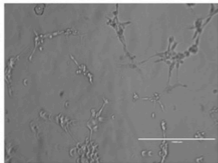

HepG2/CCR4

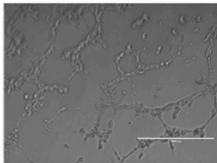

## Supplementary supporting data for Figure 4A

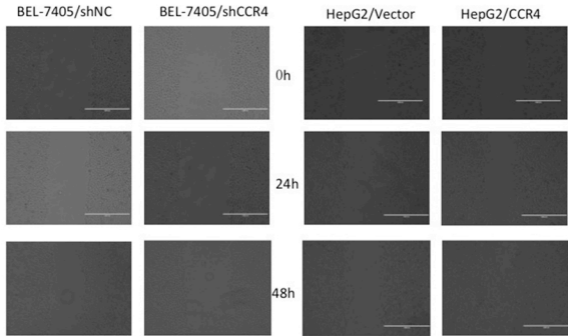

## Supplementary supporting data for Figure 4B

BEL-7405/shNC

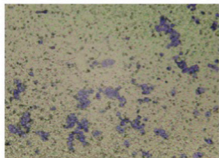

BEL-7405/shCCR4

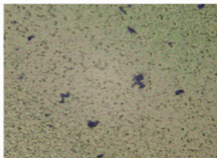

HepG2/vector

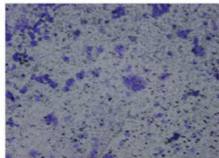

HepG2/CCR4

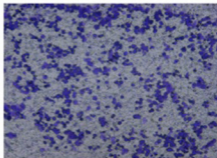

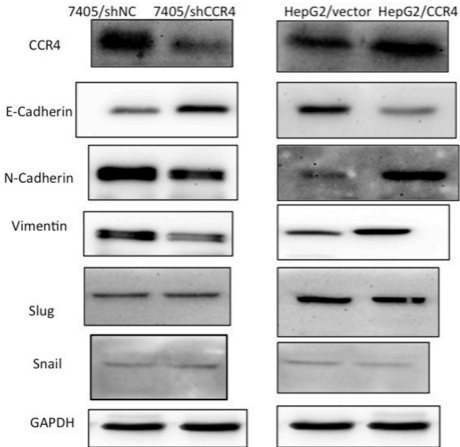

**Supplemental  
supporting  
data for  
Figure  
5A&D**

# Supplementary supporting data for Figure 6C

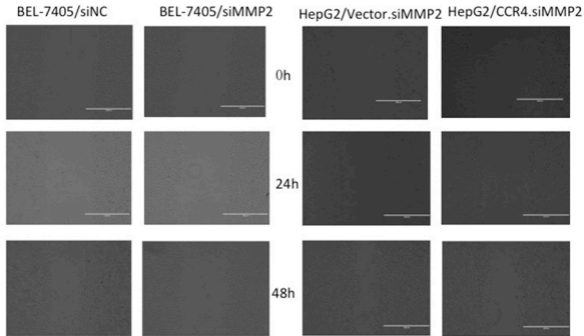



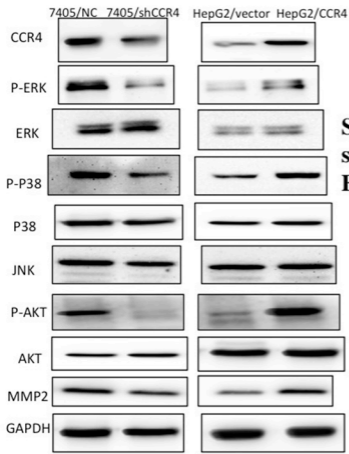

**Supplementary  
supporting data for  
Figure 7.A&C**
